# Supplementary material
Source: PubMed Central journal article supplement (PMC3625455)
Supplement: NIHMS431658-supplement-Suppl__Tables_13-17.pdf [file NIHMS431658-supplement-Suppl__Tables_13-17.pdf]

**Suppl. Table 13: Positions of tumor-specific methylation sites common between cell lines ( $\geq 4$  out of 5) and primary tumors ( $\geq 14$  out of 18).**

| chr   | start     | stop      | Ensembl_ID      | HGNC.symbol | Description                                                                                                                          |
|-------|-----------|-----------|-----------------|-------------|--------------------------------------------------------------------------------------------------------------------------------------|
| chr7  | 97360940  | 97362189  | ENSG00000006128 | TAC1        | tachykinin, precursor 1                                                                                                              |
| chr20 | 30639265  | 30639939  | ENSG00000101336 | HCK         | hemopoietic cell kinase<br>single-minded homolog<br>1 (Drosophila)                                                                   |
| chr6  | 100911555 | 100911904 | ENSG00000112246 | SIM1        | neurexophilin 1                                                                                                                      |
| chr7  | 8474326   | 8475225   | ENSG00000122584 | NXPH1       | neurexophilin 1                                                                                                                      |
| chr7  | 8483076   | 8483825   | ENSG00000122584 | NXPH1       | neurexophilin 1                                                                                                                      |
| chr2  | 176969205 | 176970504 | ENSG00000128713 | HOXD11      | homeobox D11                                                                                                                         |
| chr1  | 197879928 | 197880227 | ENSG00000143355 | LHX9        | LIM homeobox 9<br>T-cell acute lymphocytic<br>leukemia 1                                                                             |
| chr1  | 47694864  | 47695213  | ENSG00000162367 | TAL1        | LIM homeobox<br>transcription factor 1,<br>alpha                                                                                     |
| chr1  | 165323327 | 165323876 | ENSG00000162761 | LMX1A       | eomesodermin                                                                                                                         |
| chr3  | 27765097  | 27765996  | ENSG00000163508 | EOMES/TBR2  | NK6 homeobox 1                                                                                                                       |
| chr4  | 85402627  | 85403376  | ENSG00000163623 | NKX6-1      | heart and neural crest<br>derivatives expressed 2<br>zinc finger and BTB<br>domain containing 43<br>vestigial like 2<br>(Drosophila) |
| chr4  | 174448276 | 174448725 | ENSG00000164107 | HAND2       | homeobox D4                                                                                                                          |
| chr9  | 129566330 | 129566679 | ENSG00000169155 | ZBTB43      | kelch-like 6 (Drosophila)<br>regulated endocrine-<br>specific protein 18<br>homolog (rat)                                            |
| chr6  | 117584408 | 117584857 | ENSG00000170162 | VGLL2       | SRY (sex determining<br>region Y)-box 1                                                                                              |
| chr2  | 177027205 | 177027529 | ENSG00000170166 | HOXD4       | NK2 homeobox 5                                                                                                                       |
| chr3  | 183274057 | 183274331 | ENSG00000172578 | KLHL6       | chromosome 14 open<br>reading frame 23                                                                                               |
| chr2  | 220196257 | 220197006 | ENSG00000182698 | RESP18      | zinc finger protein 560                                                                                                              |
| chr13 | 112719950 | 112720174 | ENSG00000182968 | SOX1        | histone cluster 1, H4i                                                                                                               |
| chr5  | 172660795 | 172660844 | ENSG00000183072 | NKX2-5      | microRNA 124-1                                                                                                                       |
| chr14 | 29243250  | 29243899  | ENSG00000186960 | C14orf23    | Uncharacterized protein<br>interferon, alpha 12,<br>pseudogene                                                                       |
| chr19 | 9608951   | 9609250   | ENSG00000198028 | ZNF560      |                                                                                                                                      |
| chr6  | 27107272  | 27107346  | ENSG00000198339 | HIST1H4I    |                                                                                                                                      |
| chr8  | 9756191   | 9756540   | ENSG00000208010 | MIR124-1    |                                                                                                                                      |
| chr4  | 122685401 | 122685475 | ENSG00000226757 |             |                                                                                                                                      |
| chr9  | 21402751  | 21403100  | ENSG00000235108 | IFNA12P     |                                                                                                                                      |
| chr2  | 177004205 | 177004604 | ENSG00000237380 |             |                                                                                                                                      |
| chr7  | 129422815 | 129423514 | ENSG00000242078 |             |                                                                                                                                      |

**Suppl. Table 14: Genes involved in neuronal fate commitment, correlated with hyper-methylation in at least 33% of the tumors.\***

| <b>Ensembl ID</b> | <b>HGNC symbol</b> | <b>Description</b>                                                           |
|-------------------|--------------------|------------------------------------------------------------------------------|
| ENSG00000009709   | PAX7               | paired box 7 [Source:HGNC Symbol;Acc:8621]                                   |
| ENSG00000129514   | FOXA1              | forkhead box A1 [Source:HGNC Symbol;Acc:5021]                                |
| ENSG00000135903   | PAX3               | paired box 3 [Source:HGNC Symbol;Acc:8617]                                   |
| ENSG00000128710   | HOXD10             | homeobox D10 [Source:HGNC Symbol;Acc:5133]                                   |
| ENSG00000125820   | NKX2-2             | NK2 homeobox 2 [Source:HGNC Symbol;Acc:7835]                                 |
| ENSG00000169840   | GSX1               | GS homeobox 1 [Source:HGNC Symbol;Acc:20374]                                 |
| ENSG00000106038   | EVX1               | even-skipped homeobox 1 [Source:HGNC Symbol;Acc:3506]                        |
| ENSG00000205927   | OLIG2              | oligodendrocyte lineage transcription factor 2 [Source:HGNC Symbol;Acc:9398] |
| ENSG00000180818   | HOXC10             | homeobox C10 [Source:HGNC Symbol;Acc:5122]                                   |
| ENSG00000163623   | NKX6-1             | NK6 homeobox 1 [Source:HGNC Symbol;Acc:7839]                                 |
| ENSG00000136352   | NKX2-1             | NK2 homeobox 1 [Source:HGNC Symbol;Acc:11825]                                |

\* Gene IDs were derived by DAVID gene ontology analysis using all gene IDs related to hyper-methylation in at least 33% of the tumors and selecting genes belonging to GO:0048663.

**Suppl. Table 15: Homeobox genes methylated at the promoter in 33% or more of primary SCLCs**

| Ensembl ID      | HGNC Symbol | Description                                                                           |
|-----------------|-------------|---------------------------------------------------------------------------------------|
| ENSG00000116035 | VAX2        | ventral anterior homeobox 2 [Source:HGNC Symbol;Acc:12661]                            |
| ENSG00000128713 | HOXD11      | homeobox D11 [Source:HGNC Symbol;Acc:5134]                                            |
| ENSG00000128714 | HOXD13      | homeobox D13 [Source:HGNC Symbol;Acc:5136]                                            |
| ENSG00000091010 | POU4F3      | POU class 4 homeobox 3 [Source:HGNC Symbol;Acc:9220]                                  |
| ENSG00000162624 | LHX8        | LIM homeobox 8 [Source:HGNC Symbol;Acc:28838]                                         |
| ENSG00000091656 | ZFX4        | zinc finger homeobox 4 [Source:HGNC Symbol;Acc:30939]                                 |
| ENSG00000128710 | HOXD10      | homeobox D10 [Source:HGNC Symbol;Acc:5133]                                            |
| ENSG00000169840 | GSX1        | GS homeobox 1 [Source:HGNC Symbol;Acc:20374]                                          |
| ENSG00000163064 | EN1         | engrailed homeobox 1 [Source:HGNC Symbol;Acc:3342]                                    |
| ENSG00000117707 | PROX1       | prospero homeobox 1 [Source:HGNC Symbol;Acc:9459]                                     |
| ENSG00000188816 | HMX2        | H6 family homeobox 2 [Source:HGNC Symbol;Acc:5018]                                    |
| ENSG00000106038 | EVX1        | even-skipped homeobox 1 [Source:HGNC Symbol;Acc:3506]                                 |
| ENSG00000163623 | NKX6-1      | NK6 homeobox 1 [Source:HGNC Symbol;Acc:7839]                                          |
| ENSG00000188909 | BSX         | brain-specific homeobox [Source:HGNC Symbol;Acc:20450]                                |
| ENSG00000143418 | LASS2       | LAG1 homolog, ceramide synthase 2 [Source:HGNC Symbol;Acc:14076]                      |
| ENSG00000188620 | HMX3        | H6 family homeobox 3 [Source:HGNC Symbol;Acc:5019]                                    |
| ENSG00000172789 | AC012531.1  | Homeobox protein Hox-C5 [Source:UniProtKB/Swiss-Prot;Acc:Q00444]                      |
| ENSG00000119919 | NKX2-3      | NK2 transcription factor related, locus 3 (Drosophila) [Source:HGNC Symbol;Acc:7836]  |
| ENSG00000005073 | HOXA11      | homeobox A11 [Source:HGNC Symbol;Acc:5101]                                            |
| ENSG00000109132 | PHOX2B      | paired-like homeobox 2b [Source:HGNC Symbol;Acc:9143]                                 |
| ENSG00000133937 | GSC         | goosecoid homeobox [Source:HGNC Symbol;Acc:4612]                                      |
| ENSG00000100987 | VSX1        | visual system homeobox 1 [Source:HGNC Symbol;Acc:12723]                               |
| ENSG00000125820 | NKX2-2      | NK2 homeobox 2 [Source:HGNC Symbol;Acc:7835]                                          |
| ENSG00000106511 | MEOX2       | mesenchyme homeobox 2 [Source:HGNC Symbol;Acc:7014]                                   |
| ENSG00000113430 | IRX4        | iroquois homeobox 4 [Source:HGNC Symbol;Acc:6129]                                     |
| ENSG00000136352 | NKX2-1      | NK2 homeobox 1 [Source:HGNC Symbol;Acc:11825]                                         |
| ENSG00000198353 | HOXC5       | homeobox C5 [Source:HGNC Symbol;Acc:5127]                                             |
| ENSG00000198353 | HOXC5       | Homeobox protein Hox-C5 [Source:UniProtKB/Swiss-Prot;Acc:Q00444]                      |
| ENSG00000009709 | PAX7        | paired box 7 [Source:HGNC Symbol;Acc:8621]                                            |
| ENSG00000135903 | PAX3        | paired box 3 [Source:HGNC Symbol;Acc:8617]                                            |
| ENSG00000183072 | NKX2-5      | NK2 transcription factor related, locus 5 (Drosophila) [Source:HGNC Symbol;Acc:2488]  |
| ENSG00000180053 | NKX2-6      | NK2 transcription factor related, locus 6 (Drosophila) [Source:HGNC Symbol;Acc:32940] |
| ENSG00000185155 | MIXL1       | Mix1 homeobox-like 1 (Xenopus laevis) [Source:HGNC Symbol;Acc:13363]                  |
| ENSG00000150051 | MKX         | mohawk homeobox [Source:HGNC Symbol;Acc:23729]                                        |
| ENSG00000138083 | SIX3        | SIX homeobox 3 [Source:HGNC Symbol;Acc:10889]                                         |
| ENSG00000128709 | HOXD9       | homeobox D9 [Source:HGNC Symbol;Acc:5140]                                             |
| ENSG00000169856 | ONECUT1     | one cut homeobox 1 [Source:HGNC Symbol;Acc:8138]                                      |

**Suppl. Table 16: Homeobox genes methylated within the gene body of 33% or more of primary SCLCs**

| Ensemble ID     | HGNC symbol | Description                                                                          |
|-----------------|-------------|--------------------------------------------------------------------------------------|
| ENSG00000007372 | PAX6        | paired box 6 [Source:HGNC Symbol;Acc:8620]                                           |
| ENSG00000119042 | SATB2       | SATB homeobox 2 [Source:HGNC Symbol;Acc:21637]                                       |
| ENSG00000128713 | HOXD11      | homeobox D11 [Source:HGNC Symbol;Acc:5134]                                           |
| ENSG00000162761 | LMX1A       | LIM homeobox transcription factor 1, alpha [Source:HGNC Symbol;Acc:6653]             |
| ENSG00000165495 | PKNOX2      | PBX/knotted 1 homeobox 2 [Source:HGNC Symbol;Acc:16714]                              |
| ENSG00000091656 | ZFHX4       | zinc finger homeobox 4 [Source:HGNC Symbol;Acc:30939]                                |
| ENSG00000128710 | HOXD10      | homeobox D10 [Source:HGNC Symbol;Acc:5133]                                           |
| ENSG00000163064 | EN1         | engrailed homeobox 1 [Source:HGNC Symbol;Acc:3342]                                   |
| ENSG00000169840 | GSX1        | GS homeobox 1 [Source:HGNC Symbol;Acc:20374]                                         |
| ENSG00000117707 | PROX1       | prospero homeobox 1 [Source:HGNC Symbol;Acc:9459]                                    |
| ENSG00000052850 | ALX4        | ALX homeobox 4 [Source:HGNC Symbol;Acc:450]                                          |
| ENSG00000105997 | HOXA3       | homeobox A3 [Source:HGNC Symbol;Acc:5104]                                            |
| ENSG00000188909 | BSX         | brain-specific homeobox [Source:HGNC Symbol;Acc:20450]                               |
| ENSG00000188620 | HMX3        | H6 family homeobox 3 [Source:HGNC Symbol;Acc:5019]                                   |
| ENSG00000165556 | CDX2        | caudal type homeobox 2 [Source:HGNC Symbol;Acc:1806]                                 |
| ENSG00000159184 | HOXB13      | homeobox B13 [Source:HGNC Symbol;Acc:5112]                                           |
| ENSG00000119919 | NKX2-3      | NK2 transcription factor related, locus 3 (Drosophila) [Source:HGNC Symbol;Acc:7836] |
| ENSG00000197757 | HOXC6       | homeobox C6 [Source:HGNC Symbol;Acc:5128]                                            |
| ENSG00000134438 | RAX         | retina and anterior neural fold homeobox [Source:HGNC Symbol;Acc:18662]              |
| ENSG00000009709 | PAX7        | paired box 7 [Source:HGNC Symbol;Acc:8621]                                           |
| ENSG00000165588 | OTX2        | orthodenticle homeobox 2 [Source:HGNC Symbol;Acc:8522]                               |
| ENSG00000183072 | NKX2-5      | NK2 transcription factor related, locus 5 (Drosophila) [Source:HGNC Symbol;Acc:2488] |
| ENSG00000170370 | EMX2        | empty spiracles homeobox 2 [Source:HGNC Symbol;Acc:3341]                             |
| ENSG00000164778 | EN2         | engrailed homeobox 2 [Source:HGNC Symbol;Acc:3343]                                   |
| ENSG00000164093 | PITX2       | paired-like homeodomain 2 [Source:HGNC Symbol;Acc:9005]                              |
| ENSG00000128709 | HOXD9       | homeobox D9 [Source:HGNC Symbol;Acc:5140]                                            |
| ENSG00000169856 | ONECUT1     | one cut homeobox 1 [Source:HGNC Symbol;Acc:8138]                                     |
| ENSG00000171540 | OTP         | orthopedia homeobox [Source:HGNC Symbol;Acc:8518]                                    |
| ENSG00000016082 | ISL1        | ISL LIM homeobox 1 [Source:HGNC Symbol;Acc:6132]                                     |
| ENSG00000143355 | LHX9        | LIM homeobox 9 [Source:HGNC Symbol;Acc:14222]                                        |
| ENSG00000136944 | LMX1B       | LIM homeobox transcription factor 1, beta [Source:HGNC Symbol;Acc:6654]              |
| ENSG00000123364 | HOXC13      | homeobox C13 [Source:HGNC Symbol;Acc:5125]                                           |

**Suppl. Table 17: Primers for COBRA and bisulfite sequencing**

| <b>Gene</b> | <b>Forward Primer</b>      | <b>Reverse Primer</b>        |
|-------------|----------------------------|------------------------------|
| GALNTL1     | TGTTTTTTGTTTGGAGTGAAGAGTA  | CCCAAAACCACACAACCTAATTAATAA  |
| MIR-10A     | TTTTGTAGTTGGATGGGGAAG      | TCTATCTATAATATAAAAAACCAAATC  |
| MIR-129-2   | GGAGATATTTTGGGTTGAAGG      | CAAATACTTTTTAAAAATAAAAACTTCC |
| MIR-196A2   | TTTTATTTTTGGTTGATAAATATGA  | TTTAAACCCCAAACCTTAAACAATC    |
| MIR-615     | ATTGGAGAAGGAATTTTATTTAAT   | TTCTAAAACCAAATTTTAATCTATC    |
| MIR-9-3     | GAGTTTAAAAGGTAGTTGAGGGTG   | ATTTAACTACTTCCAATTCTTTATTCAA |
| AMBRA1      | TTTTTTTTATGTGAGGGAGGTTTA   | CACAAAACCAAACCCAAACTAC       |
| HOXD10      | ATTTGGAGGTTTTTAGAGTTGAGATT | CACATAACAACCAAACCAATAAAATT   |
| PROX1       | GTATTTTATAGTAGGTTGAGAGGG   | CTAAATCTAACAAAAACTCCAACCC    |
| ZNF672      | GTGGGGTTAGTTTTTAGTTATATT   | CTCTTAAAACAATATTCCCAAC       |
| DMRTA2      | TTGTTTTTGATTGTGTAATGGGTAG  | CCTTAACCTCAACTCCAAACTATCA    |
